# Supplementary material
Source: publisher figshare collection journal article supplement (https://acs.figshare.com/ndownloader/files/4710388)
Supplement: Supplementary file 1 [file 4710388]

## Supporting Information

# Localization of Sphingomyelin in Cholesterol Domains by Imaging Mass Spectrometry

Carolyn M. McQuaw<sup>1</sup>, Leiliang Zheng<sup>2</sup>, Andrew G. Ewing<sup>2</sup>, Nicholas Winograd<sup>2\*</sup>

Department of Chemistry, The Pennsylvania State University, 104 Chemistry Building,  
University Park, Pennsylvania 16802

EMAIL ADDRESS: nxw@psu.edu

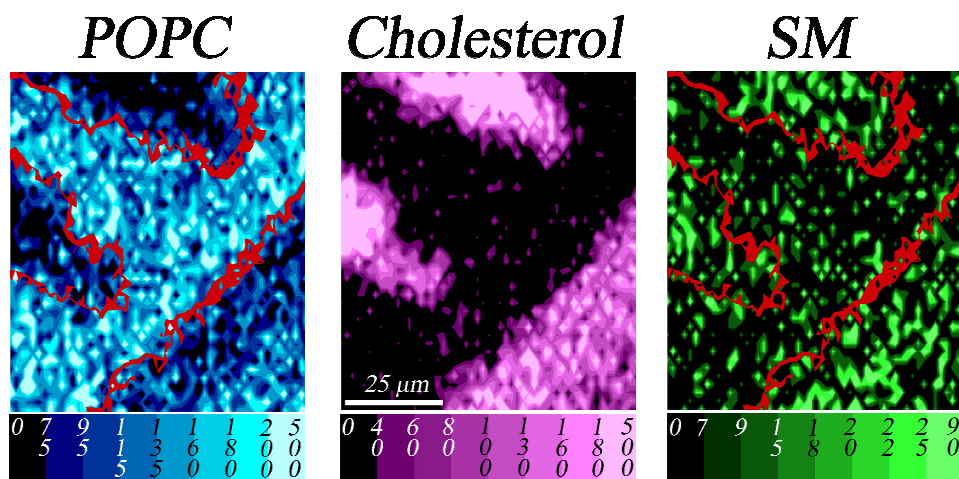

**Figure 1:** Lipid molecular ion intensity mappings for a monolayer of the 30/47/23 POPC/18:0 sphingomyelin/cholesterol mixture. POPC signal ( $[M+H]^+$  at  $m/z$  760 and  $[C_8H_{19}NPO_4]^+$  at  $m/z$  224) is represented in blue, cholesterol signal ( $[M-H]^+$  at  $m/z$  385 and  $[M-OH]^+$  at  $m/z$  369) is represented in pink, and sphingomyelin signal ( $[M+H]^+$  at  $m/z$  731 and  $[C_{17}H_{30}ON]^+$  at  $m/z$  264) is represented in green. The ion intensity scales are in counts/nC and the scale bar (25  $\mu$ m) with the cholesterol ion map applies for each. The outlines of the cholesterol domains (red) in the POPC and sphingomyelin images are shown for emphasis.
